# Supplementary material
Source: publisher site journal article supplement (https://www.dovepress.com/article/490591)

**Figure S1:** After six cycles of the R-CHOP regimen, the FDG PET-CT scan revealed that the patient had achieved complete remission, and no enlarged lymph nodes were observed in the subclavian region.


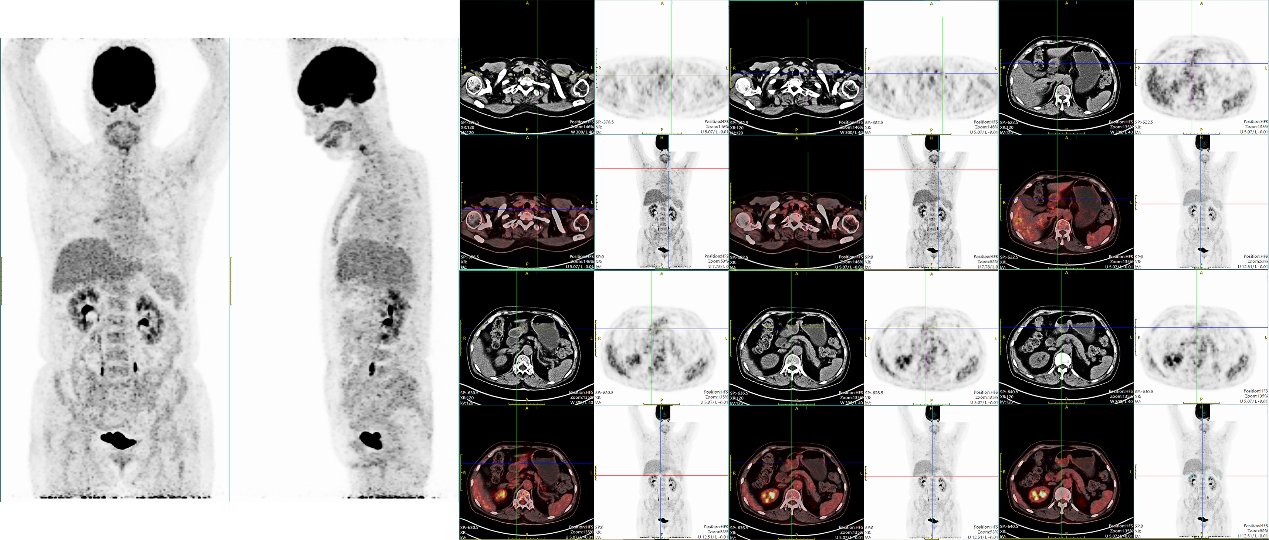

Supplement: Supplementary file 1 [file get_supplementary_file.php]
